# Supplementary material for: Enzyme-catalysed reaction for long-term fluorescent observation of single DNA molecules
Source: Royal Society of Chemistry journal article supplement (doi:10.1039/c3ra22999h), 2013-01-01
Supplement: c3ra22999h.pdf [file c3ra22999h.pdf]

## Electronic Supplementary Information (ESI)

### Enzyme-catalysed reaction for long-term fluorescent observation of single DNA molecules

5

Takao Yasui,<sup>\*a</sup> Koki Motoyama,<sup>a</sup> Noritada Kaji,<sup>a</sup> Manabu Tokeshi<sup>a,b</sup> and Yoshinobu Baba<sup>a,c</sup>

<sup>10</sup> <sup>a</sup> *Department of Applied Chemistry, Graduate School of Engineering, Nagoya University, Furo-cho, Chikusa-ku, Nagoya 464-8603, Japan. FIRST Research Center for Innovative Nanobiodevices, Nagoya University, Furo-cho, Chikusa-ku, Nagoya 464-8603, Japan. Fax: +81 52 7894666; Tel: +81 52 7893560; E-mail: yasui@apchem.nagoya-u.ac.jp*

<sup>b</sup> *Division of Biotechnology and Macromolecular Chemistry, Faculty of Engineering, Hokkaido University, Kita 13 Nishi 8, Kita-ku, Sapporo 060-8628, Japan.*

<sup>15</sup> <sup>c</sup> *Health Research Institute, National Institute of Advanced Industrial Science and Technology (AIST), Hayashi-cho 2217-14, Takamatsu 761-0395, Japan.*

*\* Corresponding author*

20

## Experimental details

T4 DNA (Nippon Gene, Tokyo, Japan) was used for DNA samples. To observe DNA molecules under a fluorescence microscope, YOYO-1 (Invitrogen, San Diego, CA) and YOPRO-1 (Invitrogen) were used for fluorescence dyes with a ratio of basepairs/dye = 5. DNA samples were diluted to 5 ng/mL using a concentrated buffer (1×TE: 10 mM Tris-HCl, 1 mM EDTA, pH=8.0, Nippon Gene). Finally dithiothreitol (DTT; 10 mM; Sigma-Aldrich Co., St. Louis, MO) was added to the DNA sample buffer as an anti-photobleaching agent.

Eclipse TE300 (Nikon, Tokyo, Japan) equipped with 488 nm laser (FLS-448-20; Sigma Koki Co., Ltd, Tokyo, Japan) was used for the single DNA molecule observations. To avoid any undesirable photocleavage of DNA molecules, the output power of the laser was set to 6.1 W/m<sup>2</sup>. DNA molecule images were captured with an EB-CCD (C7190-43, Hamamatsu Photonics K.K., Hamamatsu, Japan) through 100×/1.40 NA objective lens (Nikon) and recorded in a DV-CAM (DSR-11, Sony, Tokyo, Japan). Those recorded images were analysed with Adobe Premiere (Adobe Systems Inc., California, USA) and image processing software (Cosmos32; Library, Tokyo, Japan).

Coated cover glasses on which DNA molecules were stretched were first prepared as follows. Cover glasses (60×25 mm; Matsunami Glass Ind., Ltd., Osaka, Japan) were treated in piranha solution (H<sub>2</sub>SO<sub>4</sub>:H<sub>2</sub>O<sub>2</sub> = 4:1), then two cover glasses were stuck together with poly-L-lysine solution (Sigma-Aldrich) and dried. After drying, the cover glasses were peeled apart, leading to coated cover glasses. DNA molecules were stretched on a coated cover glass using molecular combing. A 5 μL DNA sample was dropped onto a coated cover glass which was then protected with an uncoated cover glass (18×18 mm; Matsunami Glass Ind., Ltd.). To avoid drying out of sample solution, nail polish was applied around the edges of the protecting cover glass to seal the sample in.

The glucose and catalase (GODase) enzyme reaction was done as follows: glucose (10 mM; Wako Pure Chemical Industries, Ltd., Osaka, Japan), glucose oxidase (500 nM; Sigma-Aldrich), and catalase (64 nM; Sigma-Aldrich) were dissolved in 1×TE buffer; YOYO-1 dyed T4 DNA (5 ng/mL) was added into the mixture; the first enzyme reaction was carried out at 35 °C for 5 min; and the second enzyme reaction was carried out at 25 °C for 5 min.

The protococatechuate-3,4-dioxygenase (PADase) enzyme reaction was done as follows: protococatechuic acid (2.5 mM; Wako Pure Chemical Industries, Ltd.) and protococatechate-3,4-dioxygenase (300 nM; Sigma-Aldrich) were dissolved in 1×TE buffer; YOYO-1 dyed T4 DNA (5 ng/mL) was added into the mixture; and the enzyme reaction was carried out at 37 °C for 5 min.

## Movie

Movie of the photobleaching process of a YOYO-1 stained DNA molecule with no treatment, DTT, PADase, and GODase
